# Supplementary material
Source: PubMed Central journal article supplement (PMC4582185)
Supplement: supp_dev.125807_DEV125807supp.pdf [file supp_dev.125807_DEV125807supp.pdf]

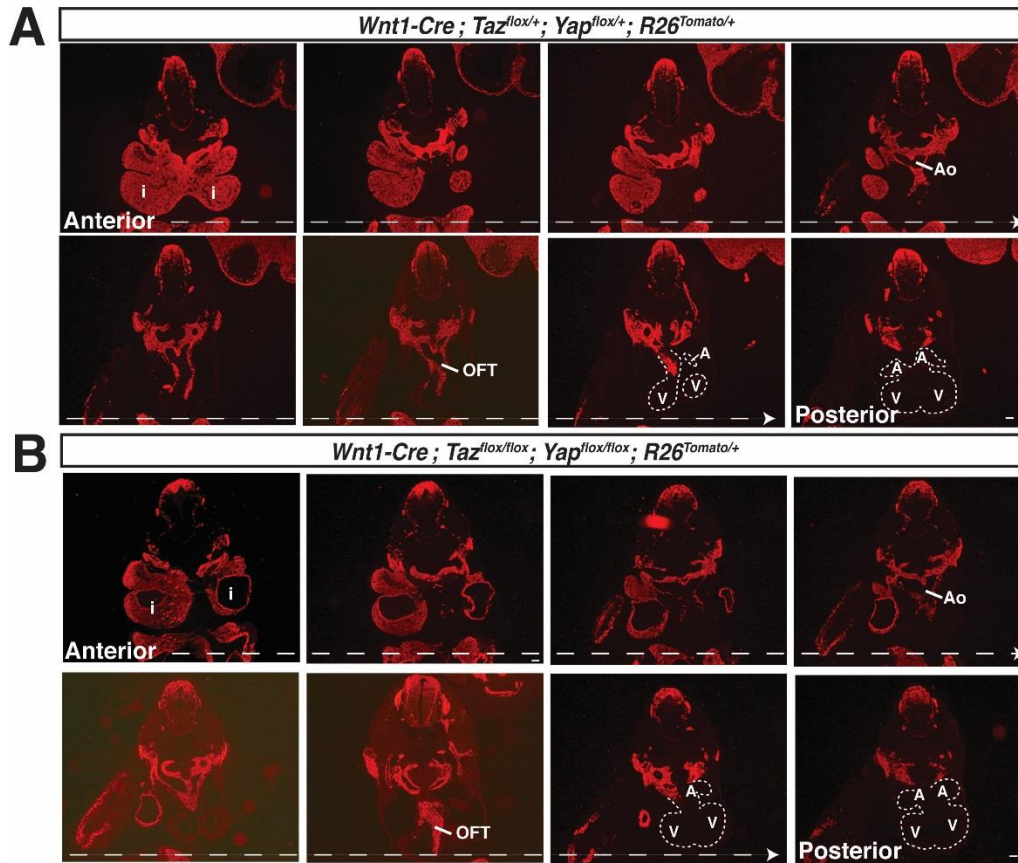

**Figure S1. Yap/Taz neural crest null embryos display normal migration and patterning of cardiac neural crest.** (A) Transverse sections of E10.5 *Wnt1-Cre; Taz<sup>flox/+</sup>; Yap<sup>flox/+</sup>; R26<sup>Tom/+</sup>* embryos stained for tdTomato (RFP). (B) Transverse sections of E10.5 *Wnt1-Cre; Taz<sup>flox/flox</sup>; Yap<sup>flox/flox</sup>; R26<sup>Tom/+</sup>* embryos stained for tdTomato (RFP). Both series of images begin at the mandibular component of the first arch artery (i), progress through the aortic sac (Ao), the outflow tract (OFT) and end at the developing heart (A=atria, V=ventricle). Scale bar (located in last image of each series, same for all images): 100  $\mu$ m.

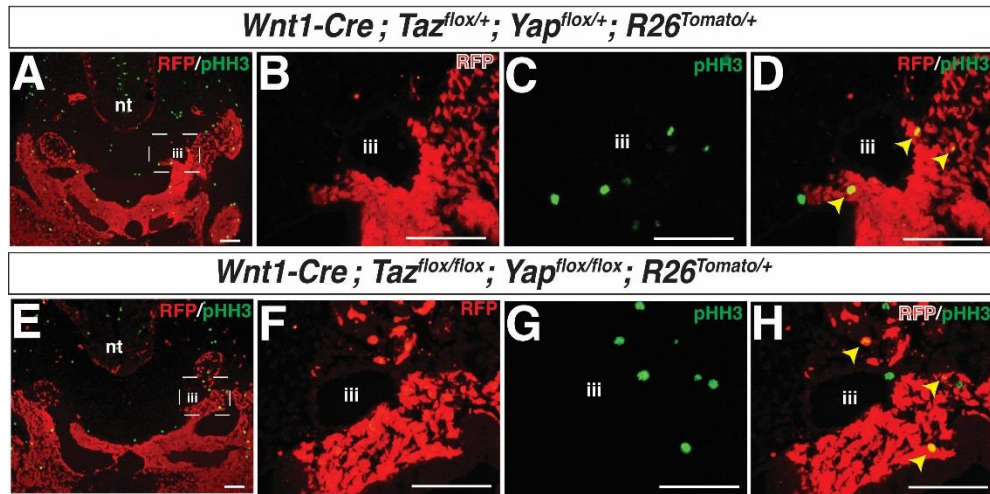

**Figure S2. Yap/Taz neural crest null embryos display no alterations in proliferation.**

(A-D) Transverse sections of E10.5 *Wnt1-Cre; Taz<sup>flox/+</sup>; Yap<sup>flox/+</sup>; R26<sup>Tom/+</sup>* embryos stained for tdTomato (RFP) and phospho-histone H3 (pHH3) as a marker of proliferation (A), RFP (B), pHH3 (C) or merged RFP/pHH3 (D). (E-H) Transverse sections of E10.5 *Wnt1-Cre; Taz<sup>flox/flox</sup>; Yap<sup>flox/flox</sup>; R26<sup>Tom/+</sup>* embryos stained for tdTomato (RFP) and phospho-histone H3 (pHH3) as a marker of proliferation (E), RFP (F), pHH3 (G) or merged RFP/pHH3 (H). Yellow arrows indicate co-positive RFP/pHH3 cells. Images were merged by combining respective red and green channels using Photoshop software (Adobe, A, D, E, H). Scale bars: 100  $\mu$ m.

**Table S1**

Figure 4A: ANOVA, Tukey-Kramer Multiple Comparisons Test Results

| Comparison                         | Mean Difference | q       | P value     |
|------------------------------------|-----------------|---------|-------------|
| -/- vs NICD/-/-                    | -2.449          | 2.474   | ns P>0.05   |
| -/- vs Yap/-/-                     | -7.968          | 8.049   | *** P<0.001 |
| -/- vs NICD/Yap/-                  | -16.500         | 16.668  | *** P<0.001 |
| -/- vs DNTEAD1/-/-                 | 0.08508         | 0.08595 | ns P>0.05   |
| -/- vs NICD/DNTEAD1/-              | -1.870          | 1.890   | ns P>0.05   |
| -/- vs Yap/DNTEAD1/-               | -6.909          | 6.980   | ** P<0.01   |
| -/- vs NICD/Yap/DNTEAD1            | -14.632         | 14.782  | *** P<0.001 |
| NICD/-/- vs Yap/-/-                | -5.518          | 5.575   | * P>0.05    |
| NICD/-/- vs NICD/Yap/-             | -14.051         | 14.194  | *** P<0.001 |
| NICD/-/- vs DNTEAD1/-/-            | 2.534           | 2.560   | ns P>0.05   |
| NICD/-/- vs NICD/DNTEAD1/-         | 0.5788          | 0.5847  | ns P>0.05   |
| NICD/-/- vs Yap/DNTEAD1/-          | -4.460          | 4.505   | ns P>0.05   |
| NICD/-/- vs NICD/Yap/DNTEAD1       | -12.183         | 12.307  | *** P<0.001 |
| Yap/-/- vs NICD/Yap/-              | -8.532          | 8.619   | *** P<0.001 |
| Yap/-/- vs DNTEAD1/-/-             | 8.053           | 8.153   | *** P<0.001 |
| Yap/-/- vs NICD/DNTEAD1/-          | 6.097           | 6.159   | ** P<0.01   |
| Yap/-/- vs Yap/DNTEAD1/-           | 1.058           | 1.069   | ns P>0.05   |
| Yap/-/- vs NICD/Yap/DNTEAD1        | -6.665          | 6.733   | ** P<0.01   |
| NICD/Yap/- vs DNTEAD1/-/-          | 16.585          | 16.754  | *** P<0.001 |
| NICD/Yap/- vs NICD/DNTEAD1/-       | 14.630          | 14.779  | *** P<0.001 |
| NICD/Yap/- vs Yap/DNTEAD1/-        | 9.591           | 9.688   | *** P<0.001 |
| NICD/Yap/- vs NICD/Yap/DNTEAD1     | 1.868           | 1.887   | ns P>0.05   |
| DNTEAD1/-/- vs NICD/DNTEAD1/-      | -1.956          | 1.975   | ns P>0.05   |
| DNTEAD1/-/- vs Yap/DNTEAD1/-       | -6.994          | 7.066   | ** P<0.01   |
| DNTEAD1/-/- vs NICD/Yap/DNTEAD1    | -14.718         | 14.868  | *** P<0.001 |
| NICD/DNTEAD1/- vs Yap/DNTEAD1/-    | -5.039          | 5.090   | * P<0.05    |
| NICD/DNTEAD1/- vs NICD/Yap/DNTEAD1 | -12.762         | 12.892  | *** P<0.001 |
| Yap/DNTEAD1/- vs NICD/Yap/DNTEAD1  | -7.723          | 7.802   | *** P<0.001 |

**Table S2**

Figure 4C: ANOVA, Tukey-Kramer Multiple Comparisons Test Results

| Comparison                         | Mean Difference | q      | P value     |
|------------------------------------|-----------------|--------|-------------|
| -/- vs NICD/-/-                    | -2.456          | 4.260  | ns P>0.05   |
| -/- vs Yap/-/-                     | -8.952          | 15.528 | *** P<0.001 |
| -/- vs NICD/Yap/-                  | -17.750         | 30.788 | *** P<0.001 |
| -/- vs DNTEAD1/-/-                 | 0.3881          | 0.6732 | ns P>0.05   |
| -/- vs NCID/DNTEAD1/-              | -1.245          | 2.160  | ns P>0.05   |
| -/- vs Yap/DNTEAD1/-               | -6.616          | 11.476 | *** P<0.001 |
| -/- vs NICD/Yap/DNTEAD1            | -12.511         | 21.701 | *** P<0.001 |
| NICD/-/- vs Yap/-/-                | -6.496          | 11.268 | *** P<0.001 |
| NICD/-/- vs NICD/Yap/-             | -15.294         | 26.528 | *** P<0.001 |
| NICD/-/- vs DNTEAD1/-/-            | 2.844           | 4.933  | * P<0.05    |
| NICD/-/- vs NICD/DNTEAD1/-         | 1.210           | 2.100  | ns P>0.05   |
| NICD/-/- vs Yap/DNTEAD1/-          | -4.160          | 7.216  | ** P<0.01   |
| NICD/-/- vs NICD/Yap/DNTEAD1       | -10.055         | 17.441 | *** P<0.001 |
| Yap/-/- vs NICD/Yap/-              | -8.798          | 15.260 | *** P<0.001 |
| Yap/-/- vs DNTEAD1/-/-             | 9.340           | 16.201 | *** P<0.001 |
| Yap/-/- vs NICD/DNTEAD1/-          | 7.707           | 13.368 | *** P<0.001 |
| Yap/-/- vs Yap/DNTEAD1/-           | 2.336           | 4.053  | ns P>0.05   |
| Yap/-/- vs NICD/Yap/DNTEAD1        | -3.559          | 6.173  | ** P<0.01   |
| NICD/Yap/- vs DNTEAD1/-/-          | 18.138          | 31.461 | *** P<0.001 |
| NICD/Yap/- vs NICD/DNTEAD1/-       | 16.505          | 28.628 | *** P<0.001 |
| NICD/Yap/- vs Yap/DNTEAD1/-        | 11.134          | 19.313 | *** P<0.001 |
| NICD/Yap/- vs NICD/Yap/DNTEAD1     | 5.239           | 9.087  | *** P<0.001 |
| DNTEAD1/-/- vs NICD/DNTEAD1/-      | -1.634          | 2.833  | ns P>0.05   |
| DNTEAD1/-/- vs Yap/DNTEAD1/-       | -7.004          | 12.149 | *** P<0.001 |
| DNTEAD1/-/- vs NICD/Yap/DNTEAD1    | -12.899         | 22.374 | *** P<0.001 |
| NICD/DNTEAD1/- vs Yap/DNTEAD1/-    | -5.370          | 9.315  | *** P<0.001 |
| NICD/DNTEAD1/- vs NICD/Yap/DNTEAD1 | -11.266         | 19.541 | *** P<0.001 |
| Yap/DNTEAD1/- vs NICD/Yap/DNTEAD1  | -5.895          | 10.226 | *** P<0.001 |

**Table S3**

Figure 4D: ANOVA, Tukey-Kramer Multiple Comparisons Test Results

| Comparison                                                      | Mean Difference | q      | P value     |
|-----------------------------------------------------------------|-----------------|--------|-------------|
| Mst1 <sup>-/-</sup> vs NICD/Mst1 <sup>-/-</sup>                 | -2.863          | 0.6144 | ns P>0.05   |
| Mst1 <sup>-/-</sup> vs Yap/Mst1 <sup>-/-</sup>                  | -1.931          | 0.4143 | ns P>0.05   |
| Mst1 <sup>-/-</sup> vs NICD/Yap/Mst1 <sup>-/-</sup>             | -5.084          | 1.091  | ns P>0.05   |
| Mst1 <sup>-/-</sup> vs NICD/Yap <sup>-/-</sup>                  | -39.241         | 8.419  | *** P<0.001 |
| Mst1 <sup>-/-</sup> vs Mst1-KI <sup>-/-</sup>                   | -2.396          | 0.5140 | ns P>0.05   |
| Mst1 <sup>-/-</sup> vs NICD/Mst1-KI <sup>-/-</sup>              | -8.509          | 1.825  | ns P>0.05   |
| Mst1 <sup>-/-</sup> vs Yap/Mst1-KI <sup>-/-</sup>               | -31.565         | 6.771  | ** P<0.01   |
| Mst1 <sup>-/-</sup> vs NICD/Yap/Mst1-KI <sup>-/-</sup>          | -41.470         | 8.897  | *** P<0.001 |
| NICD/Mst1 <sup>-/-</sup> vs Yap/Mst1 <sup>-/-</sup>             | 0.9323          | 0.2000 | ns P>0.05   |
| NICD/Mst1 <sup>-/-</sup> vs NICD/Yap/Mst1 <sup>-/-</sup>        | -2.220          | 0.4763 | ns P>0.05   |
| NICD/Mst1 <sup>-/-</sup> vs NICD/Yap <sup>-/-</sup>             | -36.378         | 7.805  | *** P<0.001 |
| NICD/Mst1 <sup>-/-</sup> vs Mst1-KI <sup>-/-</sup>              | 0.4678          | 0.1004 | ns P>0.05   |
| NICD/Mst1 <sup>-/-</sup> vs NICD/Mst1-KI <sup>-/-</sup>         | -5.645          | 1.211  | ns P>0.05   |
| NICD/Mst1 <sup>-/-</sup> vs Yap/Mst1-KI <sup>-/-</sup>          | -28.701         | 6.158  | ** P<0.01   |
| NICD/Mst1 <sup>-/-</sup> vs NICD/Yap/Mst1-KI <sup>-/-</sup>     | -38.607         | 8.283  | *** P<0.001 |
| Yap/Mst1 <sup>-/-</sup> vs NICD/Yap/Mst1 <sup>-/-</sup>         | -3.152          | 0.6763 | ns P>0.05   |
| Yap/Mst1 <sup>-/-</sup> vs NICD/Yap <sup>-/-</sup>              | -37.310         | 8.005  | *** P<0.001 |
| Yap/Mst1 <sup>-/-</sup> vs Mst1-KI <sup>-/-</sup>               | -0.4645         | 0.9965 | ns P>0.05   |
| Yap/Mst1 <sup>-/-</sup> vs NICD/Mst1-KI <sup>-/-</sup>          | -6.577          | 1.411  | ns P>0.05   |
| Yap/Mst1 <sup>-/-</sup> vs Yap/Mst1-KI <sup>-/-</sup>           | -29.634         | 6.358  | ** P<0.01   |
| Yap/Mst1 <sup>-/-</sup> vs NICD/Yap/Mst1-KI <sup>-/-</sup>      | -39.539         | 8.483  | *** P<0.001 |
| NICD/Yap/Mst1 <sup>-/-</sup> vs NICD/Yap <sup>-/-</sup>         | -34.158         | 7.328  | ** P<0.01   |
| NICD/Yap/Mst1 <sup>-/-</sup> vs Mst1-KI <sup>-/-</sup>          | 2.688           | 0.5767 | ns P>0.05   |
| NICD/Yap/Mst1 <sup>-/-</sup> vs NICD/Mst1-KI <sup>-/-</sup>     | -3.425          | 0.7348 | ns P>0.05   |
| NICD/Yap/Mst1 <sup>-/-</sup> vs Yap/Mst1-KI <sup>-/-</sup>      | -26.481         | 5.681  | * P<0.05    |
| NICD/Yap/Mst1 <sup>-/-</sup> vs NICD/Yap/Mst1-KI <sup>-/-</sup> | -36.387         | 7.807  | *** P<0.001 |
| NICD/Yap <sup>-/-</sup> vs Mst1-KI <sup>-/-</sup>               | 36.845          | 7.905  | *** P<0.001 |
| NICD/Yap <sup>-/-</sup> vs NICD/Mst1-KI <sup>-/-</sup>          | 30.732          | 6.594  | ** P<0.01   |
| NICD/Yap <sup>-/-</sup> vs Yap/Mst1-KI <sup>-/-</sup>           | 7.676           | 1.647  | ns P>0.05   |
| NICD/Yap <sup>-/-</sup> vs NICD/Yap/Mst1-KI <sup>-/-</sup>      | -2.229          | 0.4782 | ns P>0.05   |
| Mst1-KI <sup>-/-</sup> vs NICD/Mst1-KI <sup>-/-</sup>           | -6.113          | 1.312  | ns P>0.05   |
| Mst1-KI <sup>-/-</sup> vs Yap/Mst1-KI <sup>-/-</sup>            | -29.169         | 6.258  | ** P<0.01   |
| Mst1-KI <sup>-/-</sup> vs NICD/Yap/Mst1-KI <sup>-/-</sup>       | -39.074         | 8.383  | *** P<0.001 |
| NICD/Mst1-KI <sup>-/-</sup> vs Yap/Mst1-KI <sup>-/-</sup>       | -23.056         | 4.947  | ns P>0.05   |
| NICD/Mst1-KI <sup>-/-</sup> vs NICD/Yap/Mst1-KI <sup>-/-</sup>  | -32.961         | 7.072  | ** P<0.01   |
| Yap/Mst1-KI <sup>-/-</sup> vs NICD/Yap/Mst1-KI <sup>-/-</sup>   | -9.905          | 2.125  | ns P>0.05   |

**Table S4**

Figure 6A: ANOVA, Tukey–Kramer Multiple Comparisons Test Results

| Comparison                    | Mean Difference | q       | P value     |
|-------------------------------|-----------------|---------|-------------|
| -/- vs NICD/-                 | -8.353          | 1.144   | ns P>0.05   |
| -/- vs Yap/-                  | -28.897         | 3.958   | ns P>0.05   |
| -/- vs YapWW1/-               | -15.530         | 2.217   | ns P>0.05   |
| -/- vs YapWW2/-               | -34.967         | 4.789   | * P<0.05    |
| -/- vs YapWW1WW2/-            | -15.999         | 2.191   | ns P>0.05   |
| -/- vs NICD/Yap               | -59.762         | 8.185   | *** P<0.001 |
| -/- vs NICD/YapWW1            | -17.164         | 2.351   | ns P>0.05   |
| -/- vs NICD/YapWW2            | -62.327         | 8.536   | *** P<0.001 |
| -/- vs NICD/YapWW1WW2         | -32.259         | 4.418   | ns P>0.05   |
| NICD/- vs Yap/-               | -20.544         | 2.814   | ns P>0.05   |
| NICD/- vs YapWW1/-            | -7.177          | 0.9829  | ns P>0.05   |
| NICD/- vs YapWW2/-            | -26.614         | 3.645   | ns P>0.05   |
| NICD/- vs YapWW1WW2/-         | -7.646          | 1.047   | ns P>0.05   |
| NICD/- vs NICD/Yap            | -51.409         | 7.041   | *** P<0.001 |
| NICD/- vs NICD/YapWW1         | -8.811          | 1.207   | ns P>0.05   |
| NICD/- vs NICD/YapWW2         | -53.974         | 7.392   | *** P<0.001 |
| NICD/- vs NICD/YapWW1WW2      | -23.906         | 3.274   | ns P>0.05   |
| Yap/- vs YapWW1/-             | 13.367          | 1.831   | ns P>0.05   |
| Yap/- vs YapWW2/-             | -6.070          | 0.8314  | ns P>0.05   |
| Yap/- vs YapWW1WW2/-          | 12.898          | 1.766   | ns P>0.05   |
| Yap/- vs NICD/Yap             | -30.866         | 4.227   | ns P>0.05   |
| Yap/- vs NICD/YapWW1          | 11.732          | 1.607   | ns P>0.05   |
| Yap/- vs NICD/YapWW2          | -33.431         | 4.578   | ns P>0.05   |
| Yap/- vs NICD/YapWW1WW2       | -3.363          | 0.4605  | ns P>0.05   |
| YapWW1/- vs YapWW2/-          | -19.437         | 2.662   | ns P>0.05   |
| YapWW1/- vs YapWW1WW2/-       | -0.4687         | 0.06420 | ns P>0.05   |
| YapWW1/- vs NICD/Yap          | -44.232         | 6.058   | ** P<0.01   |
| YapWW1/- vs NICD/YapWW1       | -1.634          | 0.2238  | ns P>0.05   |
| YapWW1/- vs NICD/YapWW2       | -46.797         | 6.409   | ** P<0.01   |
| YapWW1/- vs NICD/YapWW1WW2    | -16.729         | 2.291   | ns P>0.05   |
| YapWW2/- vs YapWW1WW2/-       | 18.968          | 2.598   | ns P>0.05   |
| YapWW2/- vs NICD/Yap          | -24.795         | 3.396   | ns P>0.05   |
| YapWW2/- vs NICD/YapWW1       | 17.803          | 2.428   | ns P>0.05   |
| YapWW2/- vs NICD/YapWW2       | -27.360         | 3.747   | ns P>0.05   |
| YapWW2/- vs NICD/YapWW1WW2    | 2.708           | 0.3708  | ns P>0.05   |
| YapWW1WW2/- vs NICD/Yap       | -43.764         | 5.994   | ** P<0.01   |
| YapWW1WW2/- vs NICD/YapWW1    | -1.165          | 0.1596  | ns P>0.05   |
| YapWW1WW2/- vs NICD/YapWW2    | -46.328         | 6.345   | ** P<0.01   |
| YapWW1WW2/- vs NICD/YapWW1WW2 | -16.261         | 2.227   | ns P>0.05   |
| NICD/Yap vs NICD/YapWW1       | 42.598          | 5.834   | ** P<0.01   |
| NICD/Yap vs NICD/YapWW2       | -2.565          | 0.3513  | ns P>0.05   |
| NICD/Yap vs NICD/YapWW1WW2    | 27.503          | 3.767   | ns P>0.05   |
| NICD/YapWW1 vs NICD/YapWW2    | -45.163         | 6.185   | ** P<0.01   |
| NICD/YapWW1 vs NICD/YapWW1WW2 | -15.095         | 2.067   | ns P>0.05   |
| NICD/YapWW2 vs NICD/YapWW1WW2 | 30.068          | 4.118   | ns P>0.05   |

**Table S5.** Quantitative RT-PCR primer sequences

|                        |                                 |
|------------------------|---------------------------------|
| <i>cmyc</i> Forward    | 5' CTGTTTGAAGGCTGGATTTCCT 3'    |
| <i>cmyc</i> Reverse    | 5' CAGCACCGACAGACGCC 3'         |
| <i>Hrt1</i> Forward    | 5' TTGTCAACACCACCCTAAAGTCG 3'   |
| <i>Hrt1</i> Reverse    | 5' CACCTCGGTCCATCAAAGTAGTAAC 3' |
| <i>Hrt2</i> Forward    | 5' GTAAGTATGTCGTCATTTTCGG 3'    |
| <i>Hrt2</i> Reverse    | 5' TGCCTGCTTCTTCTTTCTCAAC 3'    |
| <i>Hrt3</i> Forward    | 5' TTCAGAAAAGTGGAAACAGAGGGC 3'  |
| <i>Hrt3</i> Reverse    | 5' CCAATCAGGATGGATGCTCAAAG 3'   |
| <i>Jagged1</i> Forward | 5' GCTTCCACTGGCACTGGTAGTTTC 3'  |
| <i>Jagged1</i> Reverse | 5' TGCTGACATCAAATCCCCCTC 3'     |
| <i>Tagln</i> Forward   | 5' CAACAAGGGTCCATCCTACGG 3'     |
| <i>Tagln</i> Reverse   | 5' ATCTGGGCGGCCTACATCA 3'       |
| <i>Acta2</i> Forward   | 5' GTCCCAGACATCAGGGAGTAA 3'     |
| <i>Acta2</i> Reverse   | 5' TCGGATACTTCAGCGTCAGGA 3'     |
| <i>Cnn1</i> Forward    | 5' AAACAAGAGCGGAGATTTGAGC 3'    |
| <i>Cnn1</i> Reverse    | 5' TGTCGCAGTGTTCATGCC 3'        |
| <i>Des1</i> Forward    | 5' GAGCTGGAGGATCGCTTTG 3'       |
| <i>Des1</i> Reverse    | 5' GAAGGTCTGGATAGGAAGGTTGA 3'   |
| <i>Gapdh</i> Forward   | 5' CGTCCCGTAGACAAAATGGT 3'      |
| <i>Gapdh</i> Reverse   | 5' GAATTTGCCGTGAGTGGAGT 3'      |
